# Supplementary material
Source: ML conference proceedings conference paper supplement (https://openreview.net/forum?id=BZi746oBG8)

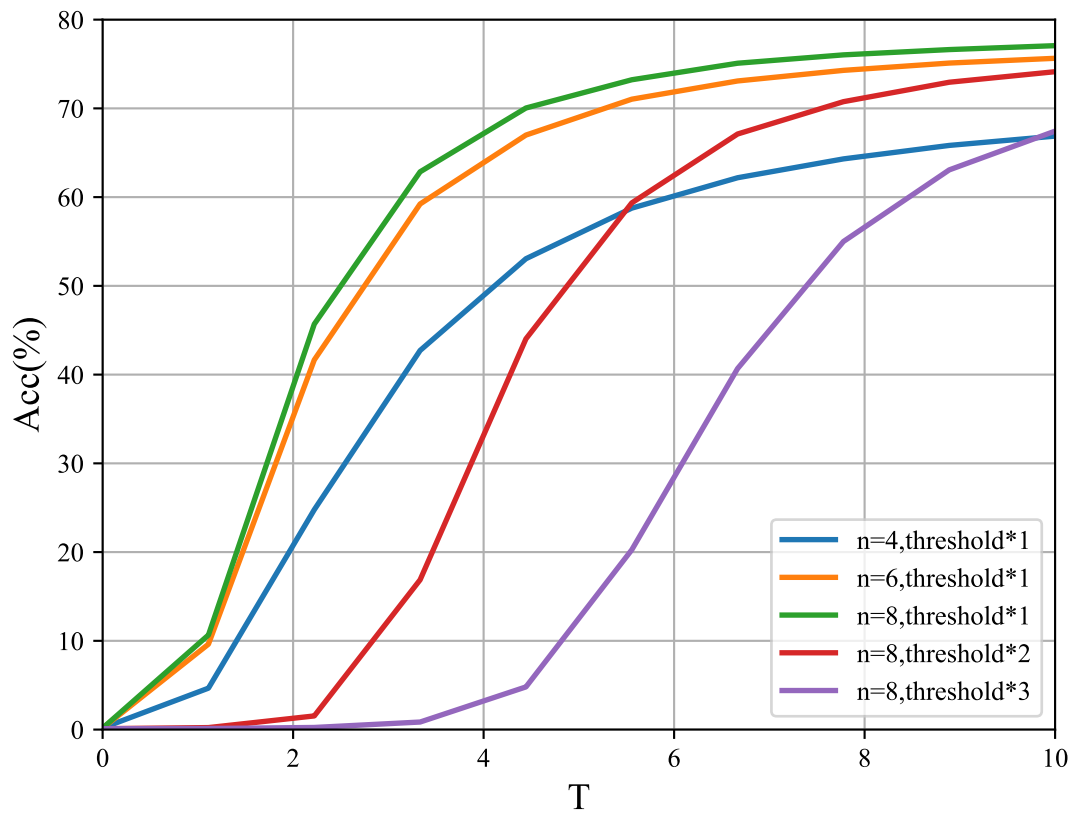

Supplement: supplementary_material [file attachment]

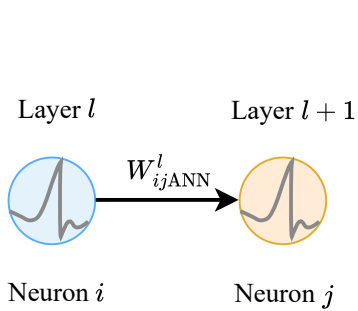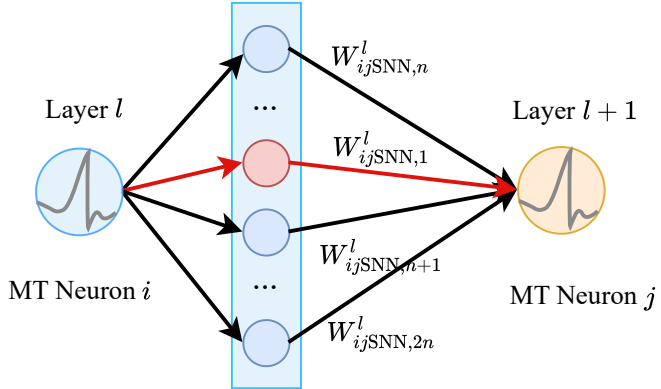

Supplement: supplementary_material [file attachment]

Synapse

Dendrite

Soma

Axon

$s_1^{l-1}(T)$

$s_2^{l-1}(T)$

...

$s_N^{l-1}(T)$

$F(\cdot)$

$I^l(T)$

$v^l(T-1)$

$m^l(T)$

MTH

$v^l(T)$

$s_1^l(T)$

$s_2^l(T)$

...

$s_{2n}^l(T)$

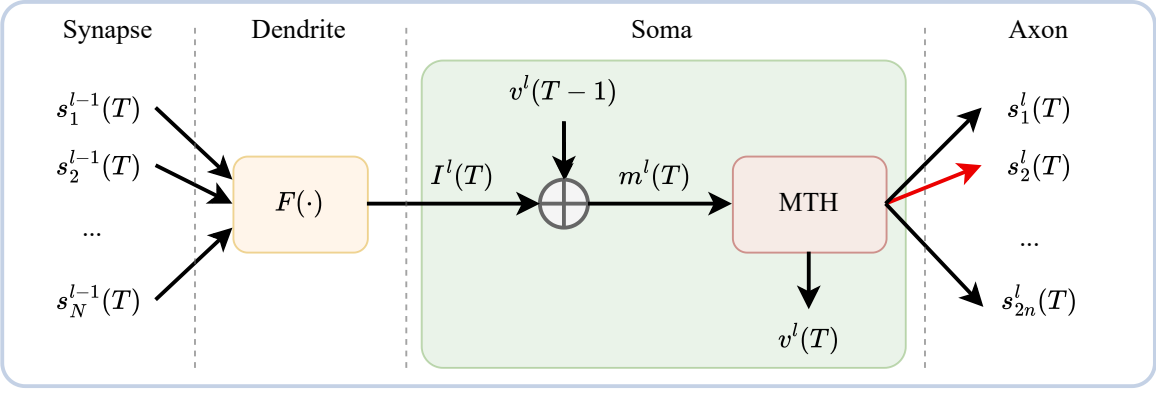

Supplement: supplementary_material [file attachment]

### Expectation Compensation (EC)

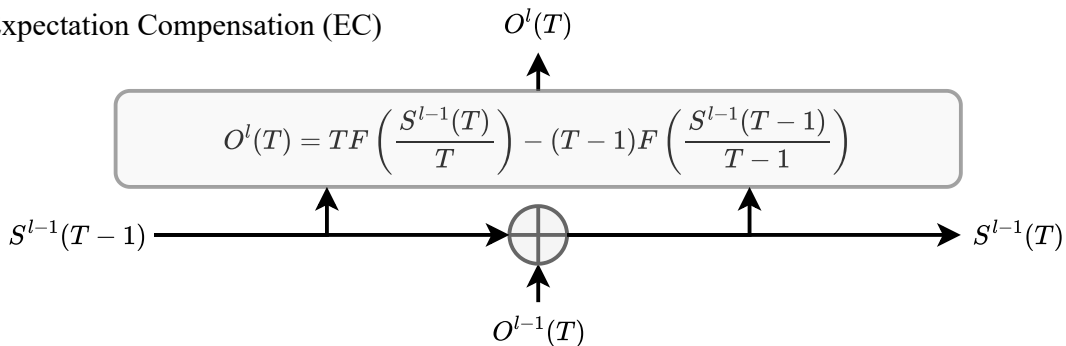

### Matrix Product-EC

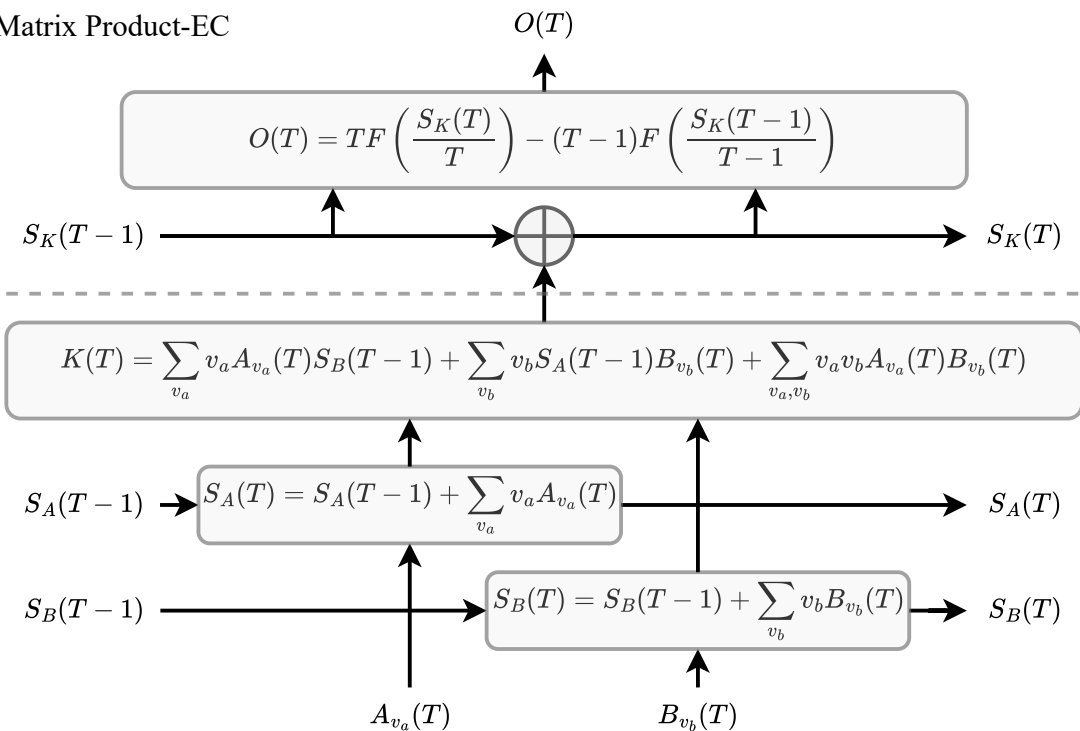

Supplement: supplementary_material [file attachment]

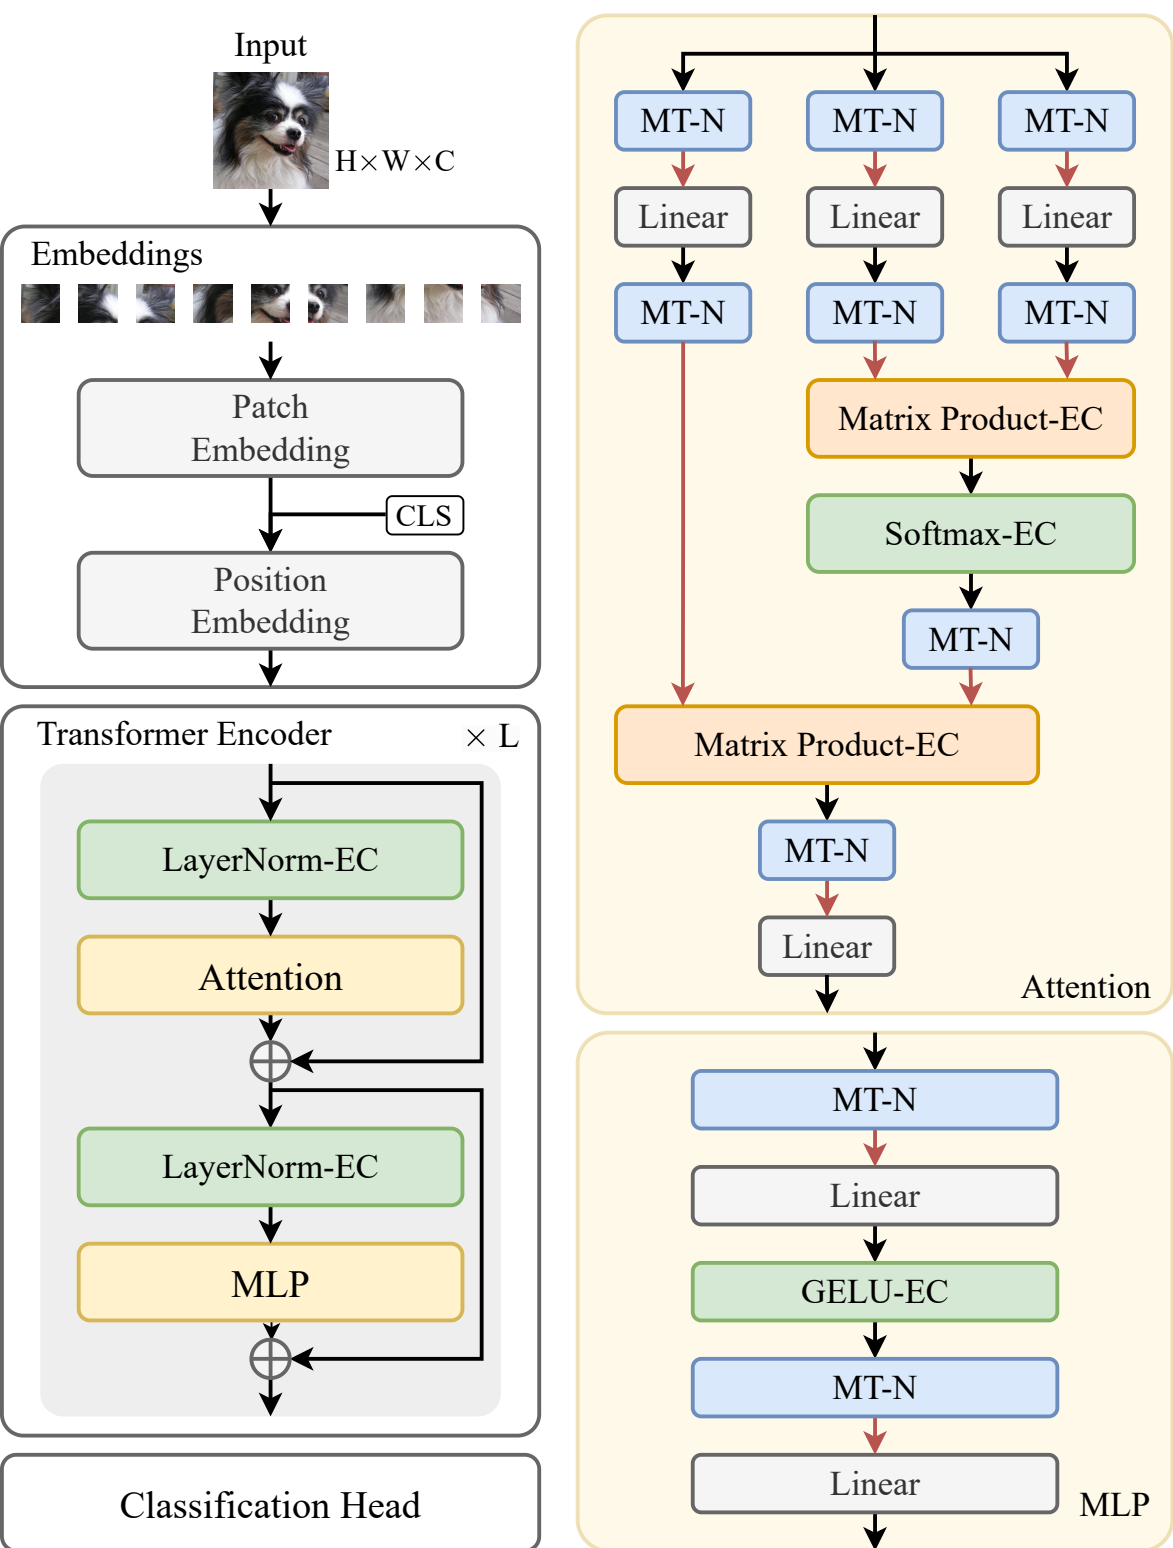

Supplement: supplementary_material [file attachment]

firing rate/percent

threshold

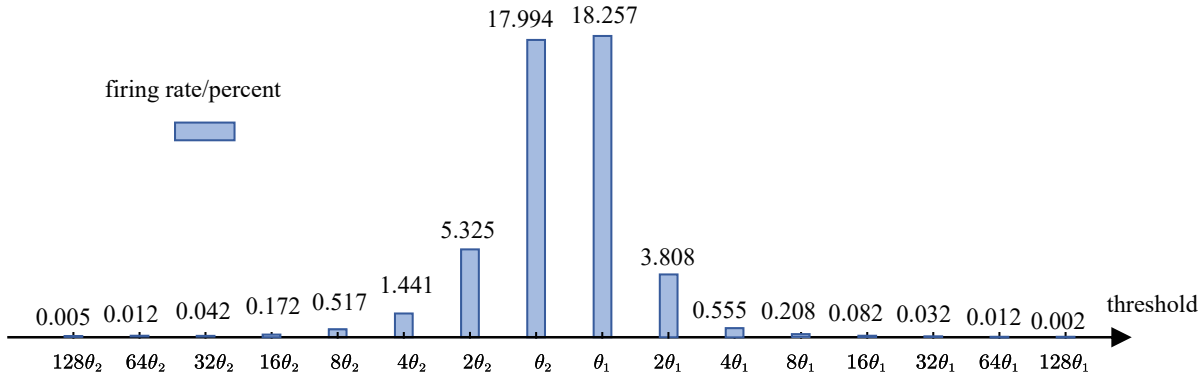

Supplement: supplementary_material [file attachment]
